# Supplementary material
Source: bioRxiv or medRxiv preprint supplement (https://www.biorxiv.org/highwire/filestream/19628/field_highwire_adjunct_files/1/070789-2.pdf)
Supplement: Supplementary file [file 070789-2.pdf]

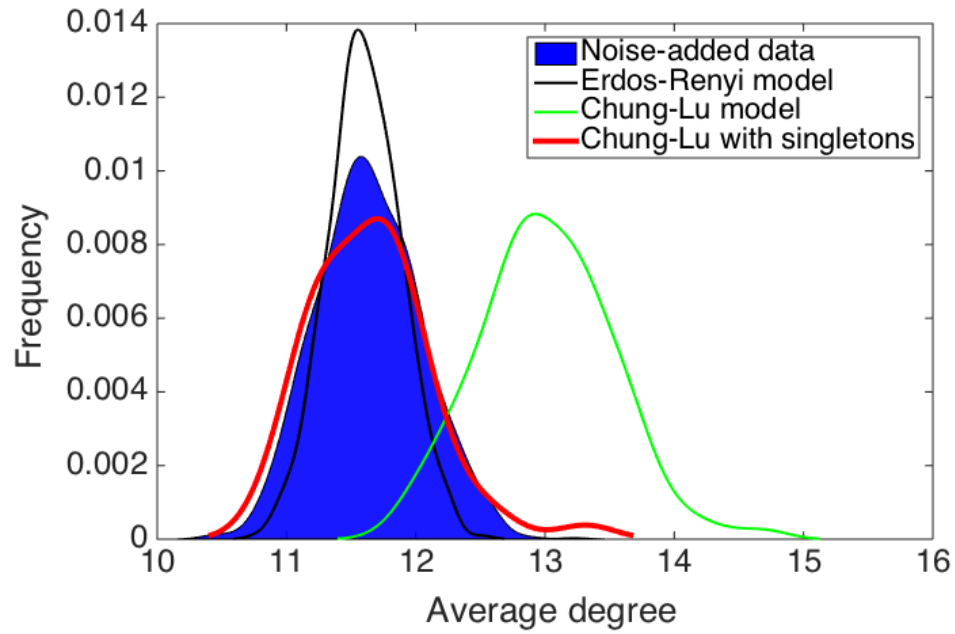

**Supplemental Figure 2: Average degree in null models vs. noise-added data.** This figure shows the Chung-Lu random graph has an artificially inflated average degree. This is due to the removal of singletons from the graph (red line includes singletons in the degree calculation; green line excludes them).
